# Supplementary material
Source: PubMed Central journal article supplement (PMC4870393)
Supplement: NIHMS782972-supplement-Supplementary_Tables.pdf [file NIHMS782972-supplement-Supplementary_Tables.pdf]

## Supplementary table 1. Clinical profile

### a) Demographic and clinical assessments

| Demographic variables | MCI (n = 455) |      | AD (n = 153) |      |
|-----------------------|---------------|------|--------------|------|
|                       | Mean          | SD   | Mean         | SD   |
| Age (years)           | 72.69         | 7.73 | 75.33        | 7.75 |
| Education (years)     | 16.09         | 2.73 | 16.07        | 2.63 |
| MMSE score            | 28.00         | 1.77 | 22.49        | 3.32 |
| GDS score             | 1.85          | 1.56 | 2.03         | 2.18 |
| NPI-D score           | 0.67          | 1.41 | 0.80         | 1.28 |
| FAQ score             | 2.75          | 3.74 | 14.22        | 6.93 |
| CDRSB score           | 1.49          | 0.99 | 5.10         | 2.30 |

### b) Beta-amyloid deposition

| Regions of Interest | MCI (n = 455) |      | AD (n = 153) |      |
|---------------------|---------------|------|--------------|------|
|                     | Mean          | SD   | Mean         | SD   |
| Frontal             | 1.39          | 0.29 | 1.57         | 0.29 |
| Cingulate           | 1.46          | 0.29 | 1.63         | 0.28 |
| Parietal            | 1.38          | 0.29 | 1.57         | 0.29 |
| Temporal            | 1.30          | 0.26 | 1.46         | 0.27 |
| Global              | 1.20          | 0.22 | 1.37         | 0.22 |

### c) GDS score

| Group | n   | # with score of 0 ([%]) | # with GDS score of >5 ([%]) | # with GDS score of >10 ([%]) |
|-------|-----|-------------------------|------------------------------|-------------------------------|
| MCI   | 455 | 94 (20.66)              | 28 (6.15)                    | 0 (0)                         |
| AD    | 153 | 29 (18.95)              | 17 (11.11)                   | 3 (1.96)                      |

**d) NPI-D score**

| <b>Group</b> | <b>n</b> | <b># with score of 0 ([%])</b> | <b># with score 1 or above ([%])</b> |
|--------------|----------|--------------------------------|--------------------------------------|
| <b>MCI</b>   | 455      | 318 (69.89)                    | 137 (30.11)                          |
| <b>AD</b>    | 153      | 96 (62.75)                     | 57 (37.25)                           |

(Abbreviations: AD = Alzheimer's disease; CDRSB = Clinical Dementia Rating Sum of Boxes score; FAQ = Functional Activities Questionnaire; GDS = Geriatric Depression Scale; MCI = mild cognitive impairment; MMSE = Mini-mental State Examination; SD = standard deviation)

**Supplementary table 2. Demographic and clinical profile of high depressed and low depressed MCI patients**

**a) First pair**

| <b>Demographic variables</b> | <b>Low depressed<br/>(n =28)</b> |           | <b>High depressed<br/>(n =28)</b> |           | <b>p-value</b> |
|------------------------------|----------------------------------|-----------|-----------------------------------|-----------|----------------|
|                              | <b>Mean</b>                      | <b>SD</b> | <b>Mean</b>                       | <b>SD</b> |                |
| GDS score                    | 1.36                             | 1.37      | 5.54                              | 1.11      | <0.01*         |
| Age (years)                  | 75.01                            | 8.91      | 73.11                             | 9.01      | 0.43           |
| Education years              | 15.89                            | 2.96      | 16.04                             | 2.50      | 0.85           |
| MMSE score                   | 28.21                            | 1.29      | 28.00                             | 1.68      | 0.59           |
| MOCA score                   | 22.93                            | 5.49      | 22.86                             | 3.39      | 0.95           |
| FAQ score                    | 1.89                             | 1.99      | 4.18                              | 5.11      | 0.03*          |
| CDRSB score                  | 1.43                             | 0.96      | 1.98                              | 1.32      | 0.08           |
| Packs/day                    | 0.50                             | 0.67      | 0.61                              | 0.69      | 0.54           |
| Years of smoking             | 8.00                             | 9.98      | 12.46                             | 15.79     | 0.21           |
| NPI total score              | 2.82                             | 4.00      | 8.32                              | 7.72      | <0.01*         |
|                              | <b>Number (Frequency[%])</b>     |           | <b>Number (Frequency[%])</b>      |           | <b>p-value</b> |
| Females                      | 16 (57.14)                       |           | 16 (57.14)                        |           | 1.00           |
| White                        | 26 (92.86)                       |           | 25 (89.29)                        |           | 0.80           |
| Never married                | 3 (10.71)                        |           | 3 (10.71)                         |           | 0.64           |
| ApoE4 0 allele               | 18 (64.29)                       |           | 19 (67.86)                        |           | 0.96           |
| ApoE4 1 allele               | 9 (32.14)                        |           | 8 (28.57)                         |           | 0.96           |
| ApoE4 2 alleles              | 1 (3.57)                         |           | 1 (3.57)                          |           | 0.96           |
| LMD                          | 6 (21.43)                        |           | 7 (25.00)                         |           | 1.00           |
| ND                           | 16 (57.14)                       |           | 11 (39.29)                        |           | 0.29           |
| CVD                          | 19 (67.86)                       |           | 22 (78.57)                        |           | 0.55           |
| MD                           | 13 (46.43)                       |           | 15 (53.57)                        |           | 0.79           |
| Alcohol abuse                | 3 (10.71)                        |           | 3 (10.71)                         |           | 1.00           |
| Drug abuse                   | 2 (7.14)                         |           | 0 (0)                             |           | 0.49           |
| PD                           | 12 (42.86)                       |           | 18 (64.29)                        |           | 0.18           |
| History of smoking           | 14 (50.00)                       |           | 15 (53.57)                        |           | 1.00           |
| Current smoking              | 0 (0)                            |           | 1 (3.57)                          |           | 1.00           |

**b) Second pair**

| <b>Demographic variables</b> | <b>Low depressed<br/>(n =28)</b> |           | <b>High depressed<br/>(n =28)</b> |           | <b>p-value</b> |
|------------------------------|----------------------------------|-----------|-----------------------------------|-----------|----------------|
|                              | <b>Mean</b>                      | <b>SD</b> | <b>Mean</b>                       | <b>SD</b> |                |
| GDS score                    | 1.50                             | 1.40      | 5.54                              | 1.11      | <0.01*         |
| Age (years)                  | 76.84                            | 7.84      | 73.11                             | 9.01      | 0.10           |
| Education years              | 16.11                            | 2.64      | 16.04                             | 2.50      | 0.92           |
| MMSE score                   | 27.71                            | 1.86      | 28.00                             | 1.68      | 0.55           |
| MOCA score                   | 23.25                            | 3.11      | 22.86                             | 3.39      | 0.65           |
| FAQ score                    | 2.54                             | 3.51      | 4.18                              | 5.11      | 0.17           |
| CDRSB score                  | 1.45                             | 0.89      | 1.98                              | 1.32      | 0.08           |
| Packs/day                    | 0.68                             | 1.87      | 0.61                              | 0.69      | 0.86           |
| Years of smoking             | 11.89                            | 16.63     | 12.46                             | 15.79     | 0.90           |
| NPI score                    | 6.14                             | 8.27      | 8.32                              | 7.72      | 0.31           |

  

|                    | <b>Number(Frequency[%])</b> | <b>Number(Frequency[%])</b> | <b>p-value</b> |
|--------------------|-----------------------------|-----------------------------|----------------|
| Females            | 16 (57.14)                  | 16 (57.14)                  | 1.00           |
| White              | 28 (100.00)                 | 25 (89.29)                  | 0.37           |
| Never married      | 4 (14.29)                   | 3 (10.71)                   | 0.72           |
| ApoE4 0 allele     | 19 (67.86)                  | 19 (67.86)                  | 1.00           |
| ApoE4 1 allele     | 8 (28.57)                   | 8 (28.57)                   | 1.00           |
| ApoE4 2 alleles    | 1 (3.57)                    | 1 (3.57)                    | 1.00           |
| LMD                | 2 (7.14)                    | 7 (25.00)                   | 0.14           |
| ND                 | 12 (42.86)                  | 11 (39.29)                  | 1.00           |
| CVD                | 20 (71.43)                  | 22 (78.57)                  | 0.76           |
| MD                 | 10 (35.71)                  | 15 (53.57)                  | 0.28           |
| Alcohol abuse      | 1 (3.57)                    | 3 (10.71)                   | 0.61           |
| Drug abuse         | 0 (0)                       | 0 (0)                       | 1.00           |
| PD                 | 8 (28.57)                   | 18 (64.29)                  | 0.02*          |
| History of smoking | 14 (50.00)                  | 15 (53.57)                  | 1.00           |
| Current smoking    | 2 (7.14)                    | 1 (3.57)                    | 1.00           |

c) Third pair

| Demographic variables | Low depressed<br>(n=28) |       | High depressed<br>(n=28) |       | p-value |
|-----------------------|-------------------------|-------|--------------------------|-------|---------|
|                       | Mean                    | SD    | Mean                     | SD    |         |
| GDS score             | 2.00                    | 1.56  | 5.54                     | 1.11  | <0.01*  |
| Age (years)           | 73.70                   | 6.51  | 73.11                    | 9.01  | 0.78    |
| Education years       | 16.21                   | 2.85  | 16.04                    | 2.50  | 0.80    |
| MMSE score            | 28.36                   | 2.04  | 28.00                    | 1.68  | 0.48    |
| MOCA score            | 24.54                   | 3.36  | 22.86                    | 3.39  | 0.07    |
| FAQ score             | 2.50                    | 3.28  | 4.18                     | 5.11  | 0.15    |
| CDRSB score           | 1.25                    | 0.80  | 1.98                     | 1.32  | 0.02*   |
| Packs/day             | 0.75                    | 0.91  | 0.61                     | 0.69  | 0.51    |
| Years of smoking      | 10.71                   | 14.38 | 12.46                    | 15.79 | 0.67    |
| NPI total score       | 4.64                    | 7.12  | 8.32                     | 7.72  | 0.07    |
|                       | Number(Frequency[%])    |       | Number(Frequency[%])     |       | p-value |
| Females               | 16 (57.14)              |       | 16 (57.14)               |       | 1.00    |
| White                 | 27 (96.43)              |       | 25 (89.29)               |       | 0.40    |
| Never married         | 4 (14.29)               |       | 3 (10.71)                |       | 0.72    |
| ApoE4 0 allele        | 19 (67.86)              |       | 19 (67.86)               |       | 1.00    |
| ApoE4 1 allele        | 8 (28.57)               |       | 8 (28.57)                |       | 1.00    |
| ApoE4 2 alleles       | 1 (3.57)                |       | 1 (3.57)                 |       | 1.00    |
| LMD                   | 3 (10.71)               |       | 7 (25.00)                |       | 0.30    |
| ND                    | 8 (28.57)               |       | 11 (39.29)               |       | 0.57    |
| CVD                   | 21 (75.00)              |       | 22 (78.57)               |       | 1.00    |
| MD                    | 18 (64.29)              |       | 15 (53.57)               |       | 0.59    |
| Alcohol abuse         | 2 (7.14)                |       | 3 (10.71)                |       | 1.00    |
| Drug abuse            | 0 (0)                   |       | 0 (0)                    |       | 1.00    |
| PD                    | 11 (39.29)              |       | 18 (64.29)               |       | 0.11    |
| History of smoking    | 14 (50.00)              |       | 15 (53.57)               |       | 1.00    |
| Current smoking       | 1 (3.57)                |       | 1 (3.57)                 |       | 1.00    |

(Abbreviations: ApoE4 0 allele = 0 apolipoprotein E4 allele; ApoE4 1 allele = 1 apolipoprotein E4 allele; ApoE4 2 alleles = 2 apolipoprotein E4 alleles; CDRSB = Clinical Dementia Rating Scale Sum of Boxes; CVD = history of cardiovascular diseases; FAQ = Functional Activities Questionnaire; GDS = Geriatric Depression Scale; LMD = history of major depression; MCI = mild cognitive impairment; MD = history of metabolic disorders; MMSE = Mini Mental State Examination score; MOCA = Montreal Cognitive Assessment; ND = history of neurological disorders; NPI = Neuropsychiatric Inventory; PD = history of psychiatric disorders; SD = standard deviation)

**Supplementary table 3. Demographic and clinical profile of low depressed and high depressed AD patients**

**a) First pair**

| <b>Demographic variables</b> | <b>Low depressed AD<br/>(n=17)</b> |           | <b>High depressed AD<br/>(n=17)</b> |           | <b>p-value</b> |
|------------------------------|------------------------------------|-----------|-------------------------------------|-----------|----------------|
|                              | <b>Mean</b>                        | <b>SD</b> | <b>Mean</b>                         | <b>SD</b> |                |
| GDS score                    | 0.71                               | 1.37      | 6.88                                | 2.40      | <0.01*         |
| Age (years)                  | 76.55                              | 8.71      | 78.44                               | 5.79      | 0.46           |
| Education years              | 16.65                              | 2.23      | 15.59                               | 3.74      | 0.33           |
| MMSE score                   | 20.82                              | 4.93      | 21.35                               | 5.16      | 0.76           |
| MOCA score                   | 15.82                              | 6.88      | 16.47                               | 6.28      | 0.78           |
| FAQ score                    | 13.12                              | 8.35      | 13.59                               | 6.71      | 0.86           |
| CDRSB score                  | 5.53                               | 3.57      | 4.62                                | 1.32      | 0.34           |
| Packs/day                    | 0.35                               | 0.61      | 0.68                                | 0.79      | 0.19           |
| Years of smoking             | 7.94                               | 14.04     | 8.06                                | 10.81     | 0.98           |
| NPI total score              | 6.18                               | 7.36      | 11.23                               | 8.28      | 0.07           |
|                              | <b>Number(Frequency[%])</b>        |           | <b>Number(Frequency[%])</b>         |           | <b>p-value</b> |
| Females                      | 7 (41.18)                          |           | 7 (41.18)                           |           | 1.00           |
| White                        | 16 (94.12)                         |           | 17 (100.00)                         |           | 1.00           |
| Never married                | 0 (0)                              |           | 2 (11.76)                           |           | 0.44           |
| ApoE4 0 allele               | 9 (52.94)                          |           | 9 (52.94)                           |           | 1.00           |
| ApoE4 1 allele               | 7 (41.18)                          |           | 7 (41.18)                           |           | 1.00           |
| ApoE4 2 alleles              | 1 (5.88)                           |           | 1 (5.88)                            |           | 1.00           |
| LMD                          | 1 (5.88)                           |           | 3 (17.65)                           |           | 0.60           |
| ND                           | 7 (41.18)                          |           | 5 (29.41)                           |           | 0.72           |
| CVD                          | 7 (41.18)                          |           | 12 (70.59)                          |           | 0.17           |
| MD                           | 7 (41.18)                          |           | 6 (35.29)                           |           | 1.00           |
| Alcohol abuse                | 0 (0)                              |           | 1 (5.88)                            |           | 1.00           |
| Drug abuse                   | 0 (0)                              |           | 0 (0)                               |           | 1.00           |
| PD                           | 8 (47.06)                          |           | 10 (58.82)                          |           | 0.73           |
| History of smoking           | 5 (29.41)                          |           | 9 (52.94)                           |           | 0.30           |
| Current smoking              | 1 (5.88)                           |           | 0 (0)                               |           | 1.00           |

**b) Second pair**

| <b>Demographic variables</b> | <b>Low depressed AD<br/>(n=17)</b> |           | <b>High depressed AD<br/>(n=17)</b> |           | <b>p-value</b> |
|------------------------------|------------------------------------|-----------|-------------------------------------|-----------|----------------|
|                              | <b>Mean</b>                        | <b>SD</b> | <b>Mean</b>                         | <b>SD</b> |                |
| GDS score                    | 0.71                               | 1.37      | 6.88                                | 2.40      | <0.01*         |
| Age (years)                  | 76.55                              | 8.71      | 78.44                               | 5.79      | 0.46           |
| Education years              | 16.65                              | 2.23      | 15.59                               | 3.74      | 0.33           |
| MMSE score                   | 22.00                              | 2.83      | 21.35                               | 5.16      | 0.65           |
| FAQ score                    | 18.00                              | 6.85      | 13.59                               | 6.71      | 0.07           |
| CDRSB score                  | 5.91                               | 2.08      | 4.62                                | 1.32      | 0.04*          |
| Packs/day                    | 0.68                               | 0.90      | 0.68                                | 0.79      | 1.00           |
| Years of smoking             | 10.47                              | 13.81     | 8.06                                | 10.81     | 0.58           |
| NPI total score              | 8.11                               | 10.26     | 11.23                               | 8.28      | 0.34           |

  

|                    | <b>Number(Frequency[%])</b> | <b>Number(Frequency[%])</b> | <b>p-value</b> |
|--------------------|-----------------------------|-----------------------------|----------------|
| Females            | 7 (41.18)                   | 7 (41.18)                   | 1.00           |
| White              | 16 (94.11)                  | 17 (100.00)                 | 1.00           |
| Never married      | 0 (0)                       | 2 (11.76)                   | 0.44           |
| ApoE4 0 allele     | 9 (52.94)                   | 9 (52.94)                   | 1.00           |
| ApoE4 1 allele     | 7 (41.18)                   | 7 (41.18)                   | 1.00           |
| ApoE4 2 alleles    | 1 (5.88)                    | 1 (5.88)                    | 1.00           |
| LMD                | 1 (5.88)                    | 3 (17.65)                   | 0.60           |
| ND                 | 3 (17.65)                   | 5 (29.41)                   | 0.69           |
| CVD                | 9 (52.94)                   | 12 (70.59)                  | 0.48           |
| MD                 | 11 (64.71)                  | 6 (35.29)                   | 0.17           |
| Alcohol abuse      | 0 (0)                       | 1 (5.88)                    | 1.00           |
| Drug abuse         | 0 (0)                       | 0 (0)                       | 1.00           |
| PD                 | 7 (41.18)                   | 10 (58.82)                  | 0.39           |
| History of smoking | 9 (52.94)                   | 9 (52.94)                   | 1.00           |
| Current smoking    | 1 (5.88)                    | 0 (0)                       | 1.00           |

c) Third pair

| Demographic variables | Low depressed AD<br>(n=17) |       | High depressed AD<br>(n=17) |       | p-value |
|-----------------------|----------------------------|-------|-----------------------------|-------|---------|
|                       | Mean                       | SD    | Mean                        | SD    |         |
| GDS score             | 0.88                       | 0.60  | 6.88                        | 2.40  | <0.01*  |
| Age (years)           | 76.24                      | 8.61  | 78.44                       | 5.79  | 0.39    |
| Education years       | 15.71                      | 2.29  | 15.59                       | 3.74  | 0.91    |
| MMSE score            | 22.82                      | 1.98  | 21.35                       | 5.16  | 0.29    |
| MOCA score            | 17.00                      | 4.43  | 16.47                       | 6.28  | 0.78    |
| FAQ score             | 13.76                      | 7.22  | 13.59                       | 6.71  | 0.94    |
| CDRSB score           | 4.76                       | 1.66  | 4.62                        | 1.32  | 0.78    |
| Packs/day             | 0.65                       | 0.88  | 0.68                        | 0.79  | 0.92    |
| Years of smoking      | 11.35                      | 14.90 | 8.06                        | 10.81 | 0.47    |
| NPI total score       | 7.00                       | 9.70  | 11.23                       | 8.28  | 0.18    |
|                       | Number(Frequency[%])       |       | Number(Frequency[%])        |       | p-value |
| Females               | 7 (41.18)                  |       | 7 (41.18)                   |       | 1.00    |
| White                 | 16 (94.11)                 |       | 17 (100.00)                 |       | 1.00    |
| Never married         | 0 (0)                      |       | 2 (11.76)                   |       | 0.44    |
| ApoE4 0 allele        | 9 (52.94)                  |       | 9 (52.94)                   |       | 1.00    |
| ApoE4 1 allele        | 7 (41.18)                  |       | 7 (41.18)                   |       | 1.00    |
| ApoE4 2 alleles       | 1 (5.88)                   |       | 1 (5.88)                    |       | 1.00    |
| LMD                   | 2 (11.76)                  |       | 3 (17.65)                   |       | 1.00    |
| ND                    | 4 (23.53)                  |       | 5 (29.41)                   |       | 1.00    |
| CVD                   | 9 (52.94)                  |       | 12 (70.59)                  |       | 0.48    |
| MD                    | 12 (70.59)                 |       | 6 (35.29)                   |       | 0.08    |
| Alcohol abuse         | 3 (17.65)                  |       | 1 (5.88)                    |       | 0.60    |
| Drug abuse            | 1 (5.88)                   |       | 0 (0)                       |       | 1.00    |
| PD                    | 5 (29.41)                  |       | 10 (58.82)                  |       | 0.17    |
| History of smoking    | 8 (47.06)                  |       | 9 (52.94)                   |       | 1.00    |
| Current smoking       | 1 (5.88)                   |       | 0 (0)                       |       | 1.00    |

(Abbreviations: ApoE4 0 allele = 0 apolipoprotein E4 allele; ApoE4 1 allele = 1 apolipoprotein E4 allele; ApoE4 2 alleles = 2 apolipoprotein E4 alleles; CDRSB = Clinical Dementia Rating Scale Sum of Boxes; CVD = history of cardiovascular diseases; FAQ = Functional Activities Questionnaire; GDS = Geriatric Depression Scale; LMD = history of major depression; MCI = mild cognitive impairment; MD = history of metabolic disorders; MMSE = Mini Mental State Examination; MOCA = Montreal Cognitive Assessment; ND = history of neurological disorders; NPI = Neuropsychiatric Inventory; PD= history of psychiatric disorders; SD = standard deviation)



**Supplementary table 4. Demographic and clinical assessments between not depressed and depressed patients with MCI (a) and AD (b)**

**a)**

| <b>Demographic variables</b> | <b>Not Depressed MCI<br/>(n=80)</b> |           | <b>Depressed MCI<br/>(n=80)</b> |           | <b>p-value</b> |
|------------------------------|-------------------------------------|-----------|---------------------------------|-----------|----------------|
|                              | <b>Mean</b>                         | <b>SD</b> | <b>Mean</b>                     | <b>SD</b> |                |
| GDS score                    | 0                                   | 0         | 3.50                            | 1.63      | <0.01*         |
| NPI-D score                  | 0                                   | 0         | 2.46                            | 1.94      | <0.01*         |
| Age (years)                  | 75.11                               | 7.11      | 73.19                           | 9.15      | 0.14           |
| Education years              | 16.01                               | 2.69      | 15.59                           | 2.86      | 0.33           |
| MMSE score                   | 28.26                               | 1.48      | 28.24                           | 1.63      | 0.92           |
| MOCA score                   | 24.01                               | 3.18      | 23.58                           | 3.36      | 0.40           |
| FAQ score                    | 2.04                                | 2.80      | 4.28                            | 4.72      | <0.01*         |
| CDRSB score                  | 1.33                                | 0.80      | 1.98                            | 1.19      | <0.01*         |
| Packs/day                    | 0.42                                | 0.75      | 0.59                            | 0.72      | 0.17           |
| Years of smoking             | 8.29                                | 14.42     | 11.90                           | 15.55     | 0.13           |
| NPI total score              | 2.91                                | 4.81      | 11.09                           | 8.45      | <0.01*         |

  

|                    | <b>Number(Frequency[%])</b> | <b>Number(Frequency[%])</b> | <b>p-value</b> |
|--------------------|-----------------------------|-----------------------------|----------------|
| Females            | 34 (42.50)                  | 33 (41.25)                  | 1.00           |
| White              | 76 (95.00)                  | 80 (100)                    | 0.13           |
| Never married      | 2 (2.50)                    | 2 (2.50)                    | 0.91           |
| ApoE4 0 allele     | 47 (58.75)                  | 45 (56.25)                  | 0.85           |
| ApoE4 1 allele     | 27 (33.75)                  | 27 (33.75)                  | 0.85           |
| ApoE4 2 alleles    | 6 (7.50)                    | 8 (10.00)                   | 0.85           |
| LMD                | 8 (10.00)                   | 18 (64.29)                  | 0.05           |
| ND                 | 22 (27.50)                  | 25 (31.25)                  | 0.73           |
| CVD                | 61 (76.25)                  | 54 (67.50)                  | 0.29           |
| MD                 | 32 (40.00)                  | 36 (45.00)                  | 0.63           |
| Alcohol abuse      | 3 (3.75)                    | 6 (7.50)                    | 0.50           |
| Drug abuse         | 1 (1.25)                    | 0 (0)                       | 1.00           |
| PD                 | 21 (26.25)                  | 48 (60.00)                  | <0.01*         |
| History of smoking | 29 (36.25)                  | 41 (51.25)                  | 0.08           |
| Current smoking    | 2 (2.50)                    | 3 (3.75)                    | 1.00           |

**b)**

| Demographic variables | Not Depressed AD<br>(n=22) |       | Depressed AD<br>(n=22) |       | p-value |
|-----------------------|----------------------------|-------|------------------------|-------|---------|
|                       | Mean                       | SD    | Mean                   | SD    |         |
| GDS score             | 0                          | 0     | 2.95                   | 3.09  | <0.01*  |
| NPI-D score           | 0                          | 0     | 2.09                   | 1.31  | <0.01*  |
| Age (years)           | 75.80                      | 7.53  | 72.85                  | 8.09  | 0.22    |
| Education years       | 16.36                      | 2.19  | 16.59                  | 2.38  | 0.74    |
| MMSE score            | 21.45                      | 4.31  | 22.55                  | 3.10  | 0.34    |
| MOCA score            | 15.14                      | 5.48  | 17.10                  | 5.06  | 0.23    |
| FAQ score             | 14.18                      | 9.06  | 16.05                  | 4.91  | 0.40    |
| CDRSB score           | 6.23                       | 3.84  | 5.11                   | 1.81  | 0.23    |
| Packs/day             | 0.48                       | 0.76  | 0.41                   | 0.68  | 0.76    |
| Years of smoking      | 7.14                       | 10.53 | 8.09                   | 14.66 | 0.81    |
| NPI total score       | 4.18                       | 5.76  | 13.45                  | 12.37 | <0.01*  |

  

|                    | Number(Frequency[%]) | Number(Frequency[%]) | p-value |
|--------------------|----------------------|----------------------|---------|
| Females            | 9 (40.91)            | 9 (40.91)            | 1.00    |
| White              | 19 (86.36)           | 20 (90.91)           | 0.24    |
| Married            | 22 (100.00)          | 19 (86.36)           | 0.11    |
| ApoE4 0 allele     | 10 (45.45)           | 10 (45.45)           | 1.00    |
| ApoE4 1 allele     | 8 (36.36)            | 8 (36.36)            | 1.00    |
| ApoE4 2 alleles    | 4 (18.18)            | 4 (18.18)            | 1.00    |
| LMD                | 1 (4.55)             | 6 (27.27)            | 0.10    |
| ND                 | 7 (31.82)            | 6 (27.27)            | 1.00    |
| CVD                | 14 (63.64)           | 11 (50.00)           | 0.54    |
| MD                 | 9 (40.91)            | 13 (59.09)           | 0.37    |
| Alcohol abuse      | 1 (4.55)             | 0 (0)                | 1.00    |
| Drug abuse         | 0 (0)                | 0 (0)                | 1.00    |
| PD                 | 6 (27.27)            | 13 (59.09)           | 0.07    |
| History of smoking | 9 (40.91)            | 7 (31.82)            | 0.76    |
| Current smoking    | 1 (4.55)             | 1 (4.55)             | 1.00    |

**Supplementary table 5.**

**a) Partial correlation between depressive symptoms and A $\beta$  levels in frontal, parietal, cingulate and temporal regions in MCI due to AD (n = 91)**

| Clinical assessments | Region of interest  |                     |                     |                     |
|----------------------|---------------------|---------------------|---------------------|---------------------|
|                      | Frontal             | Cingulate           | Parietal            | Temporal            |
| GDS score            | r = -0.12, p = 0.33 | r = -0.01, p = 0.96 | r < -0.01, p = 0.98 | r = -0.22, p = 0.08 |
| NPI-D score          | r = -0.11, p = 0.39 | r = -0.06, p = 0.66 | r = -0.06, p = 0.64 | r = -0.13, p = 0.28 |

**b) Partial correlation between depressive symptoms and A $\beta$  levels in frontal, parietal, cingulate and temporal regions in MCI not due to AD (n=281)**

| Clinical assessments | Region of interest |                    |                    |                    |
|----------------------|--------------------|--------------------|--------------------|--------------------|
|                      | Frontal            | Cingulate          | Parietal           | Temporal           |
| GDS score            | r = 0.03, p = 0.66 | r = 0.05, p = 0.43 | r = 0.11, p = 0.08 | r = 0.13, p = 0.04 |
| NPI-D score          | r < 0.01, p = 0.99 | r = 0.05, p = 0.46 | r = 0.07, p = 0.24 | r = 0.04, p = 0.49 |
